# Supplementary material
Source: Springer Nature journal article supplement (https://www.springermedizin.de/resource/supplementary/12986_2007_120_MOESM1_ESM.pdf/25655408)

**Non-diabetic**

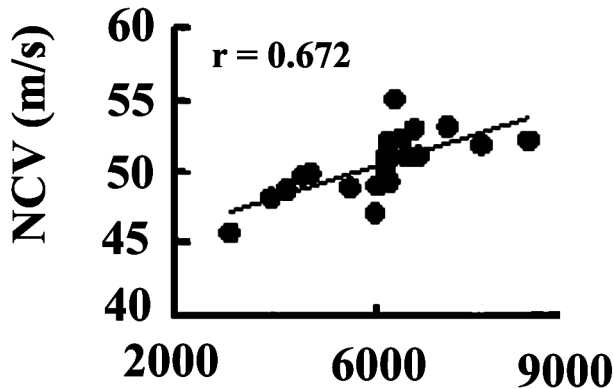

**STZ-diabetic**

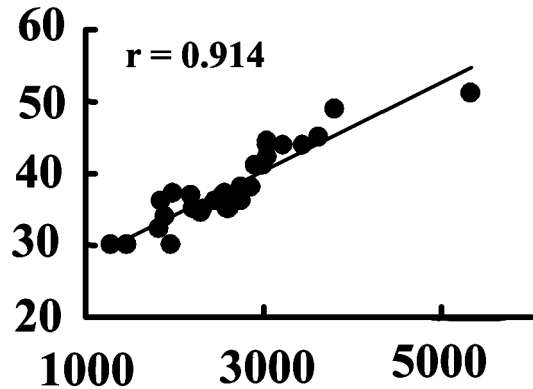

**$\text{Na}^+/\text{K}^+$ -ATPase**

Supplement: MOESM1 [file 25655408]
